# Supplementary material
Source: PubMed Central journal article supplement (PMC4037358)

Figure S1

HUVECs

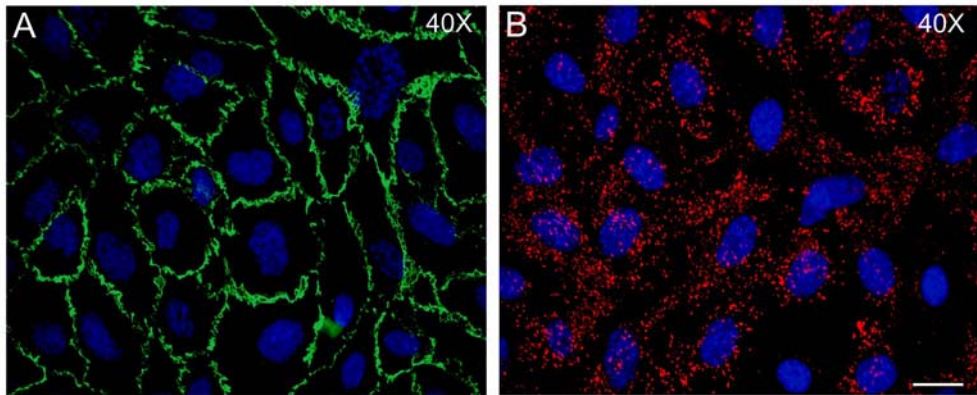

Green: VE-cadherin; Red: vWF; Blue: Nucleus (DAPI)

Figure S2

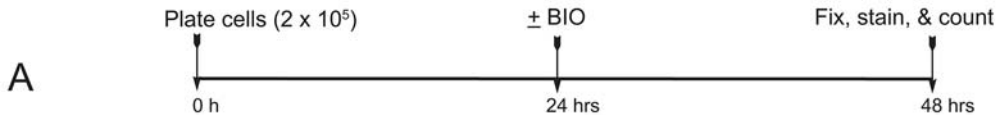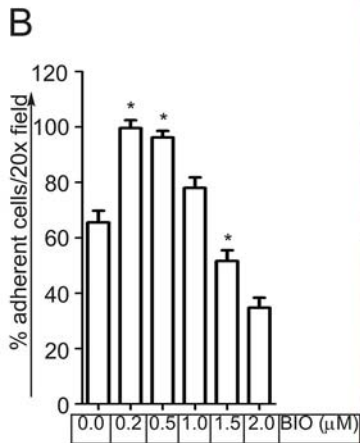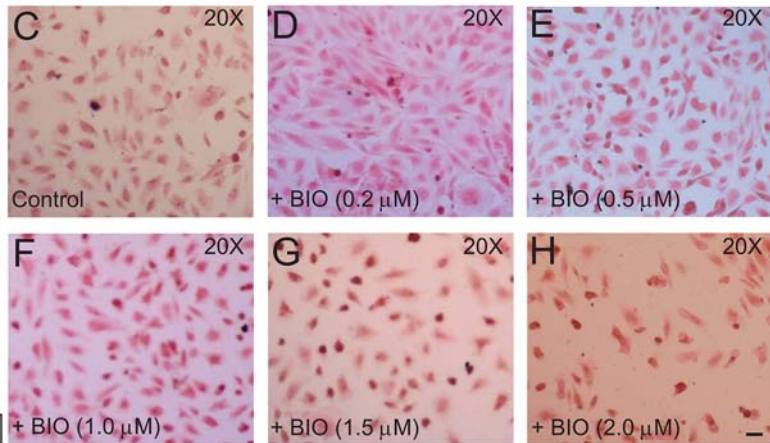

## HUVECs - Wnt3a

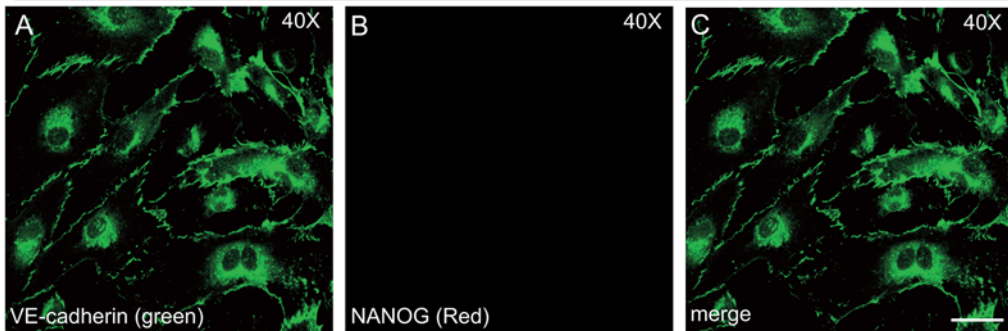

## HUVECs + Wnt3a

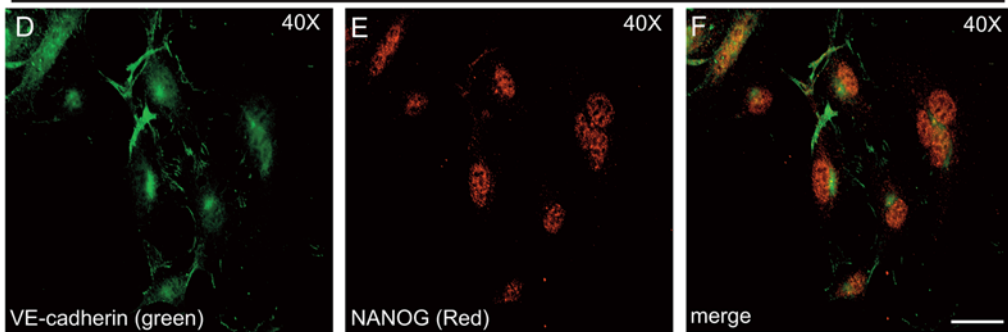

**G**

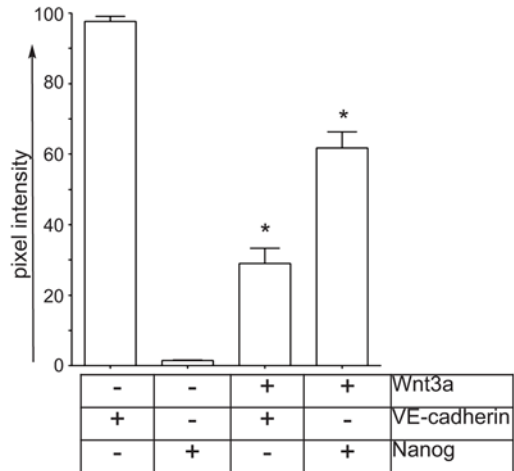

**Figure S4: Nucleotide sequence of human *NANOG* promoter/enhancer (-2.2 kb)**

1 AACCTCCGCC TCTGGAGTTC AAGTGATTCT CCTGTCTCAG CCTCCCTAGT AGATGGG**ATT**  
61 **AC**AGGCCTGC ACCACCACGC CCAGCCCAGT **TAAT**TTTTTGT ATTTTTAGTA CAGACAGGGT  
121 TTCACCATGT TGGTCAGGCT GGTCTTGAAC TCCTGATCTC AGATGATGCA CCTGGCTCGG  
181 CCTCGCAAAG TGCTGGG**ATT** **AC**AGGTGTGA GCCACCGTGC CCAGCCGTTA GCTCATTTTA  
241 ACACATCCTT AGTCCAGCCT GTTCCAAAAA ATCTAAAGTC AGATAGCTTC CTAAACCTCA  
301 ACTTTATTCC AATTGCTTTC CTTGGCGAAG AATGTAGTAA GTCGGCCTTC CAGCCACCAG  
361 CCCCTTCCCT TTGGTCTTTC ACTCCGGAGG CTCTTACCCT AGACACAATG GGACAGGGAG  
421 CGGGGGATGG GGAATTCAG CTCAGGCTTT TATGCAAAGA CCCCCTTCTG CAAAGAACAA  
481 AGCTTCTGGT ACCTGCCCTT TGGAGAGCTG CGGGCAAGCT CAGCCTCGGT GAGTCTTGGT  
541 GGCCTTGACA GCCCCACTT AACAACTGT GCTG**ATTA**AG AGAGACAGGA GGGCAAGTTT  
601 TTCCCTTCTT TTAAAGAAAT CATCCTATTT CCTACGAGAC ATAGACTATC TGCCTGAAGC  
661 ATGATGTACT AGCCCCACTC ACCGGCTCCC TGATGCCCTT ATGCT**TAAT** TTCTCCGGAA  
721 TGGTAGTCTG AGAAGAAAAA AGATTACGCC CAATTTTATT TCCTTGTTTC ACATCAAGCA  
781 ATACTTTTCG AGTCTTTGCA TTGTGAACAA AAGTCAGCTT GTGTGGGAGC AAAGCCAGCT  
841 GCTCTGGGTG CAGACCCAGG AGCAGAGTGC AGAGGAGAAT GAGTCAAAGA GTTTTGTCTT  
901 CAAAA**ATTAC** **TAAT**CGGGA TTTGCTAAGA GTTTACTTTT CGGTATGGAA GACTGGAAAA  
961 GAGAAAGAAA TCTTAGGTTT CTTGAATGTT GGGTTTGGGA ATAGGAAGGA AAATCGAAAA  
1021 CTGTAGACTT TGTCCATAAA TGTTAGTGCT GGAACCCAC TCTAAAAACT TTGTTCTTTT  
1081 GGAAAACACC TCCCTTCCCC CAGAAACACA CACACCCACA CGAGATGGGC ACGGAGTAGT  
1141 CTTGAAAGAC ATGACAAATC ACCAGACCTG GGAAGAAGCT AAAGAGCCAG AGGGAAAAAG  
1201 CCAGAAGTCG ACTACCTGGG AGGAGGGATA GACAAGAAAC CAAACTAAAG GAAACTAAGG  
1261 TAGGTGCTGA AAACAAGTAC CATTTTCAAC **ATTA**ACTGAT GCCTTGCTT CATGCTAT**TAA**  
1321 **T**GCCATGTTG TGTTTCACTA TAACCTCAGA GTGAATGAAA GAGGAAAATG GAGCTAGTTG  
1381 AAATTTCTGC CTAAACTAGC CAGATTTTGA GACACTAAGT TATCTCAAAT CAAGAAATCA  
1441 CCC**TAAT**GAG AATTTCAATA ACCTCAGGAA TTTAAGGTGC ATGCATCCCC CACCCCCCCC

1501 TTTTTTTTTT GAGACGTAGT CCCGCTCTGT TGCCCAGGCT GGAGTACAGT GGC GCGATAT  
1561 CGGCTCACCA CAACCTCTGC CTCCCAGGTT CAAGGGATTC TCCCGCCTCA GCTTCCAGAG  
1621 TAGCTGGGAC TACAGACACC CACCACCATG CGTGGCTAAT TTTTGTATTT TTAGTAGAGA  
1681 GGGGGTTTTG CCATGTTGGC CAGGCTGGTT TCAAACCTCT GACTTCAGGT GATCCGCCTG  
1741 CCACGGCCTC CCAATTTACT GGGATTACAG GGGTGGGCCA CCGCGCCCGG CCTTTTTCTT  
1801 AATTTTTTAAA AATATTAAAG TTTTATCCCA TTCCTGTTGA ACCATATTCC TGATTTAAAA  
1861 GTTGAAACG TGGTGAACCT AGAAGTATTT GTTGCTGGGT TTGTCTTCAG GTTCTGTTGC  
1921 TCGGTTTTCT AGTTCCCCAC CTAGTCTGGG TTA CTCTGCA GCTACTTTTG CATTACAATG  
1981 GCCTTGGTGA GACTGGTAGA CGGGATTAAC TGAGAATTCA CAAGGTGGG TCAGTAGGGG  
2041 GTGTGCCCGC CAGGAGGGGT GGGTCTAAGG TGATAGAGCC TTCATTATAA ATCTAGAGAC  
2101 TCCAGGATTT TAACGTTCTG CTGGACTGAG CTGGTTGCCT CATGTTATTA TGCAGGCAAC  
2161 TCACTTTATC CCAATTTCTT GATACTTTTC CTTCTGGAGG TCCTATTTCT CTAACATCTT  
2221 CCAGAAAAGT CTTAAAGCTG CCTTAACCTT TTTTCCAGTC CACCTCTTAA ATTTTTCTCT  
2281 CCTCTTCTC TATACTAACA TG

**Figure S5: Nucleotide sequence of human *BRACHYURY* promoter/enhancer (-3.8 kb)**

1 GAGTCTAAAG **AATTAC**GTTA CACACCTTTT AAAGCAATAA CAAAAGCCAT TGGGTTTCTT  
61 **TAAT**GGGAG AGACAAATAA ACCAATTGGT GGCAG**AATTA** TTGGCCATGA AACATGGCTG  
121 TCATCTCTAA TGTAGAACTT GTGACTGTTT GCGATCAGTC CGCTTAGTCA GTGTGGGAGA  
181 AGGAGCTCAT GAGAAGAACA AAATGAAAAA AAGACGAGGA ACACCCCAA ATATGAACAT  
241 TGCTTAGTGC TTGAGGTTAG CATTATATA CATAGAGAGA GATAAACATA CAGCCAGCCC  
301 TCCATAGCCA CAGGTTCCAT ATCCGTGGTT GGTTGAATTG ATAGAAAACA TTCCAAACTC  
361 CCTCTCCCA **TAAT**GAAAG AATA**AAATT** **ATACA**ATAA AAAGCAATAC AGTATAACTA  
421 CTATTTGCAT AGTGTTACAT TGT**ATTAG**T **ATTATA**AGTA ATCCAGAAGT GATTTATAGT  
481 TCATGGAGGA AGTCCATAGG TTATATGCAA ATACCATGCC AAGGGACTAG GGCATCCCTG  
541 GATTCTGCCA TCTTTGTAGG TCCTGGAACC AATCCCCCAC AGATACTGTG GGTGACTGTT  
601 TTACATATAT ATGAAGACAG ATACATAT**AT** **AAT**ATTTCTA CAAGGAGTAC ATATAT**TAAT**C  
661 AGAAAAGAAA TTCATTTGTT TTTCTTGCAG AAAGAGAGGG ACTAGAGTGT GGGGTAAGAG  
721 TCACGCGAGG CTGTCCTCCA CCCCTCCTTG AGCCTGTTAC AGCTTCATTG TTGCCTGCTT  
781 CTAAAGATAA ATGGCTTTGC TTTTTCAGAA GGGATTGGGC CCAGGAAAAC TGCCTCTCTG  
841 GGAGTCGAGT GGGGTGTGTG TGTGTGTTTT CTTATAAAAT GTTTCAAGCA TGTTTTCGGT  
901 GGGACAGTTG CATCCTGAGG CCCAGCCATA AGGCTTTGTC TTGTTTTTCT CTGAATGGCT  
961 GGGCTTGCCA AGGAGAGATA GACCCTGGGA GCGAAACAGC TGGCGGTGCC TCAGCCCCTC  
1021 TTTCTCCCA AGGAAGCGCA TTGTT**ATTAA** CTGGGAATTC TTTATAGCCG GGCTGGAGGA  
1081 AGTTTTGGCT GTAAACTGTC ATGCACTGCA GCCTTCGCTG AAAAGGCGGA GGGAGTGGGC  
1141 CTGGTCCTGG GAACCGAGGA ACAAAGATCA GAAATCAGC CACAGAAAGG GGAGGAAAAA  
1201 TAAACGTTAG AAAGTGAAGA CAGGTGACAC TACACAAGTG CTGGCCAAAG TCGGTGACTT  
1261 CCAACCTCTA CCTCCTCCGA CTTGGGTGGT TCAATTCCTG GGTCGTACTC TTCAATGCTT  
1321 CAGACATTCT CTCTGGAGAG TAGAAATTTT **ATTAC**GCGTG TTAGAAACGG AATATTCTTT  
1381 CCTGCTGAAG TTGTATTCTT ATTTGGCCGT GCCCCTCCTG TTCGGAACAG TTTTAGAGCG  
1441 ATCTGTTAAA CCCTCCAGTC TTCTTTGGCG CTTCCCGACT GTGGGAAAAG CGGCCGCGAC

1501 GCCGTCCGAG CGCAGGGGAG GGATCCAGCC TTCGGGACTC CTTTGCCCTG AAGCCGCAGG  
1561 AGAGGTTTTG CTCCCGTGCC TAGGGTTCCG AGGCCCTCAA TTGCCTGGGA CCCACCCTCG  
1621 TTCCTCCTTC ACCTCCCCTC CACTTTTCCC TTTTATCTTA TCCTCGGGAG GCCTTGGGCC  
1681 AAAGCGATGA CCTCTTAGAC ATTTTAATAC CCGGAGTAAG GAGAGTAACA CGCACCACGC  
1741 TCTCCCCCAA AGCCCAGGAC CCGATGAGCC AGTGAAGGCG TGTCAGGAGG GTCCGGCGTC  
1801 AGGAGCAAAT GAGGTCTTTT TGGTGCCTCT TTCTAGAAGG AACTTCCCC ACCTCGGGTC  
1861 AGCCCCCTGG GAATATCCAT GCATCCCAGA CATCAAAGA CACTGAGAAA TGCGGACAGG  
1921 GACTAGACGC TCCGGCTTCC TGA CTGCTCGTGTGTGTAAGTTG GAGAAGGGAG AGAAGGAGCC  
1981 CTGTCCCCCA CGGGCGGCAG GCACCCTTCC CCGGGACTGG CTCCTGGCAG CCCTCCGCAT  
2041 ACCGCGAGGC GGGTCGATCC CTCGAGTCCC GGGCGGGGAT CCCTCCTTCG GCTTCCCCAG  
2101 CAATTCCCGA CCCCAGGAGC AGCCCAGGCTG GCGGAGGGGC GAGGGGCAGG GGGCAGGGGG  
2161 CAGGGGAGAC TTAGCGCGGG GCGCAGATAC CATGTCCGCG GGAAAGCCCC CTTGCTAGGG  
2221 CGCAAGACTC CTCTGAACTC GCTGCCCCAC CCGATGCGCA GGCTTTCTCT AGAGGGGTTG  
2281 GGGCTGGGGT GCCCGCTCAG GAGACCGGGA AACAGAGGCT GCTACCCGAG GCAGGCCCTC  
2341 GTCCAGCGAA TGGGCGAGGT GTGCAGAAGC GCAAAGCCAG GCCTTGGAAG GGGGAGCTTC  
2401 TGCCTCCTTC CCCCTTCTG GGCTCCCGTT TTAGGAGGAA TGTTACTGTT TAAAGAGACC  
2461 CCACTGAACT ATTTCTGCT CATTGTACC TCTCCTTCGC TCTCCTCGCG TAAGTTCTCA  
2521 CCGAAAGGTA ATAAAAACAAC CGCTGCCGAC ACCGCTTGGC GCTGGGCCGG GCGGGGAAAG  
2581 CGCCCCGAGT CCCACTAGTC CGGACCACCC CGCCAGCCCC GACCTTCTCC CACCTTCCGT  
2641 GAAAGCAATG ACACAGCAGA AACCACGCAC ACGCCTGGCA CACTCGATGC GCGCGCTGAC  
2701 CTCGGCAACA AGTCCTGTTT TTATAAGAGA GCGAGGAGGA CACTTCTCAG AAGGGGTTGT  
2761 TTTGCTTTTG CTTATTTCCG TCCATTTCCC TCTCTGCGCG CGGACCTTCC TTTTCCAGAT  
2821 GGTGAGAGCC GCGGGGACAC CCGACGCCGG GGCAGGCTGA TCCACGATCC TGGGTGTGCG  
2881 TAACGCCGCC TGGGGCTCCG TGGGCGAGGG ACGTGTGGGG ACAGGTGCAC CGGAAACTGC  
2941 CAGACTGGAG AGTTGAGGCA TCGGAGGCGC GAGAACAGCA CTACTACTGC GGCGAGACGA  
3001 GCGCGGCGCA TCCCAAAGCC CGGCCAAATG CGCTCGTCCC TGGGAGGGGA GGGAGGCGCG  
3061 CCTGGAGCGG GGACAGGTGA GGCCGCGCGA ACGTTCCAGC CTGGCGCGGC TGCGGGATCC

3121 GGGCGCGCTG GGAAAGCGAG GAGGACCCCG CGCGGGAATC AGGGAGCATC GCAGGCTGCC  
3181 GGGCAGCCCC TCGCGGAAGT GCGGGCTGGG GCGGGCTGGG GCGGGCTGGG GCAGGCCGGG  
3241 GCGTCCAGCT TACCTTCCTC CGGGGCTTGC CCCGCCGCTT TGATGGAGGT GCAAACATTT  
3301 GGAGAAGGGC GGGGGTGTAG GGGCTGGGCC GGGGCTCGCA GGGCTGGGGC CCCGGATTTA  
3361 CATGAAACAG GCGTGCGGGA GCCCATTGTT GGCCCCCGGC CTCCCAGACC CGCCCGGCTG  
3421 GGTCTGATAT GGCCGCTCTC GGCCAATGGG AGGCTGCCCC GCACTTCAAA GCGTGC GCGG  
3481 CCCAATCCGC CGAGCACCCC AGCGCTGCCG CCGCGGCTCT ATTTATGGGG AGGGCACTGA  
3541 ATTTTCGGTCC CCAGAGACCT AACTAGTAG AGCCTTGGGG AGTTCAAGTG GAATAACTTC  
3601 TCCCCACCCC TCTGCCCCCG TCCCCTCCCC CCAAGTCTTG GTCCGCGCCC TCCTCCCGGG  
3661 TCTGTGCCGG GACCCGGGAC CCGGGAGCCG TCGCAGGTCT CGGTCCAAGG GGCCCCTTTT  
3721 CTCGGAAGGG CGGCGGCCAA GAGCAGGGAA GGTGGATCTC AGGTAGCGAG TCTGGGCTTC  
3781 GGGGACGGCG GGGAGGGGAG CCGGACGGGA GGATG



Figure S6

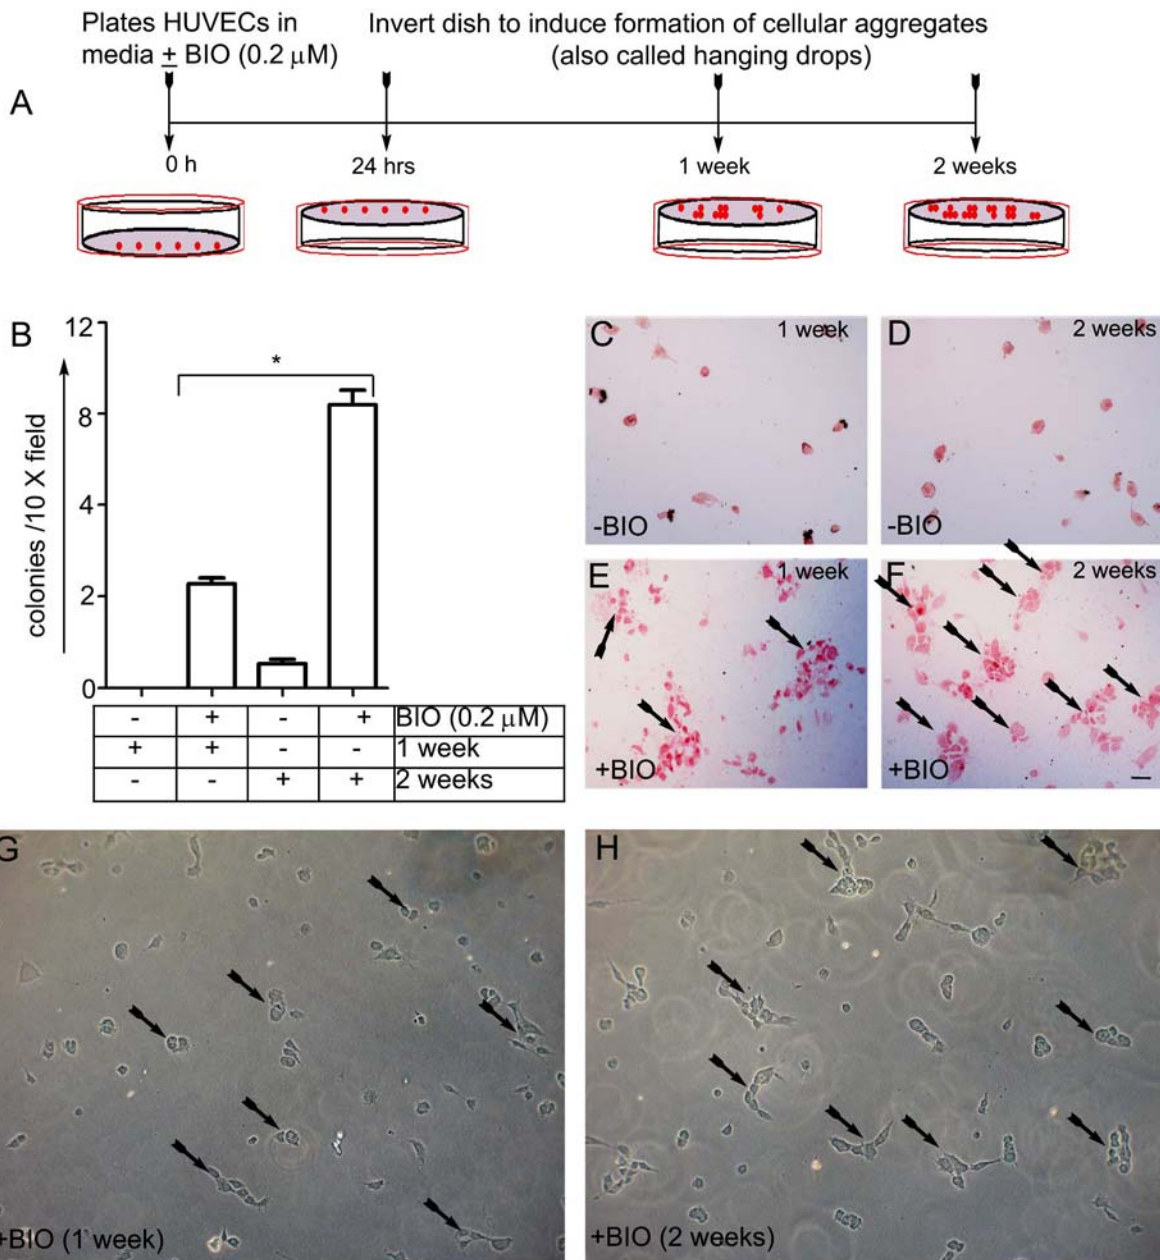

Figure S7

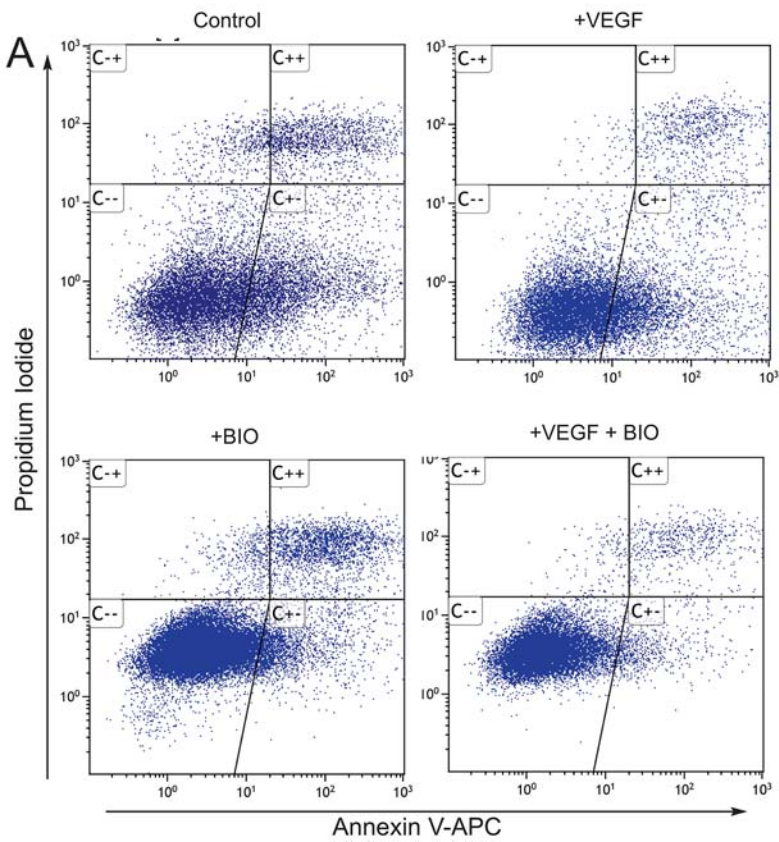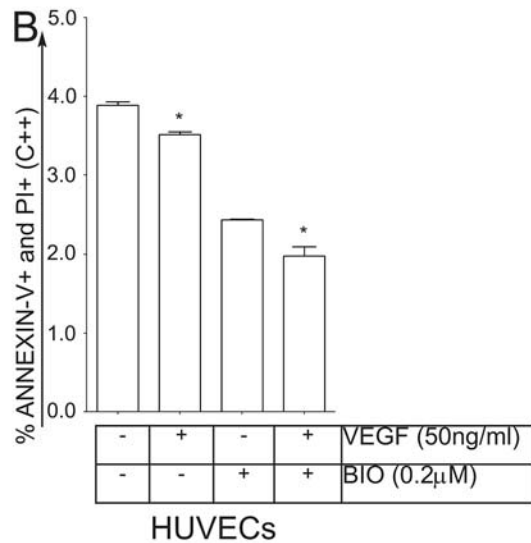

Figure S8

HUVECs

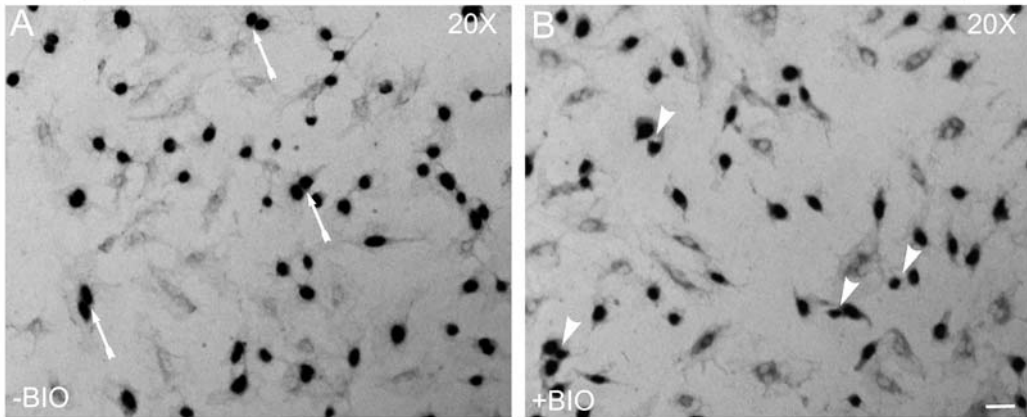

**Arrows:** Symmetric cell division (SCD)

**Arrowheads:** Asymmetric cell division (ACD)

Figure S9

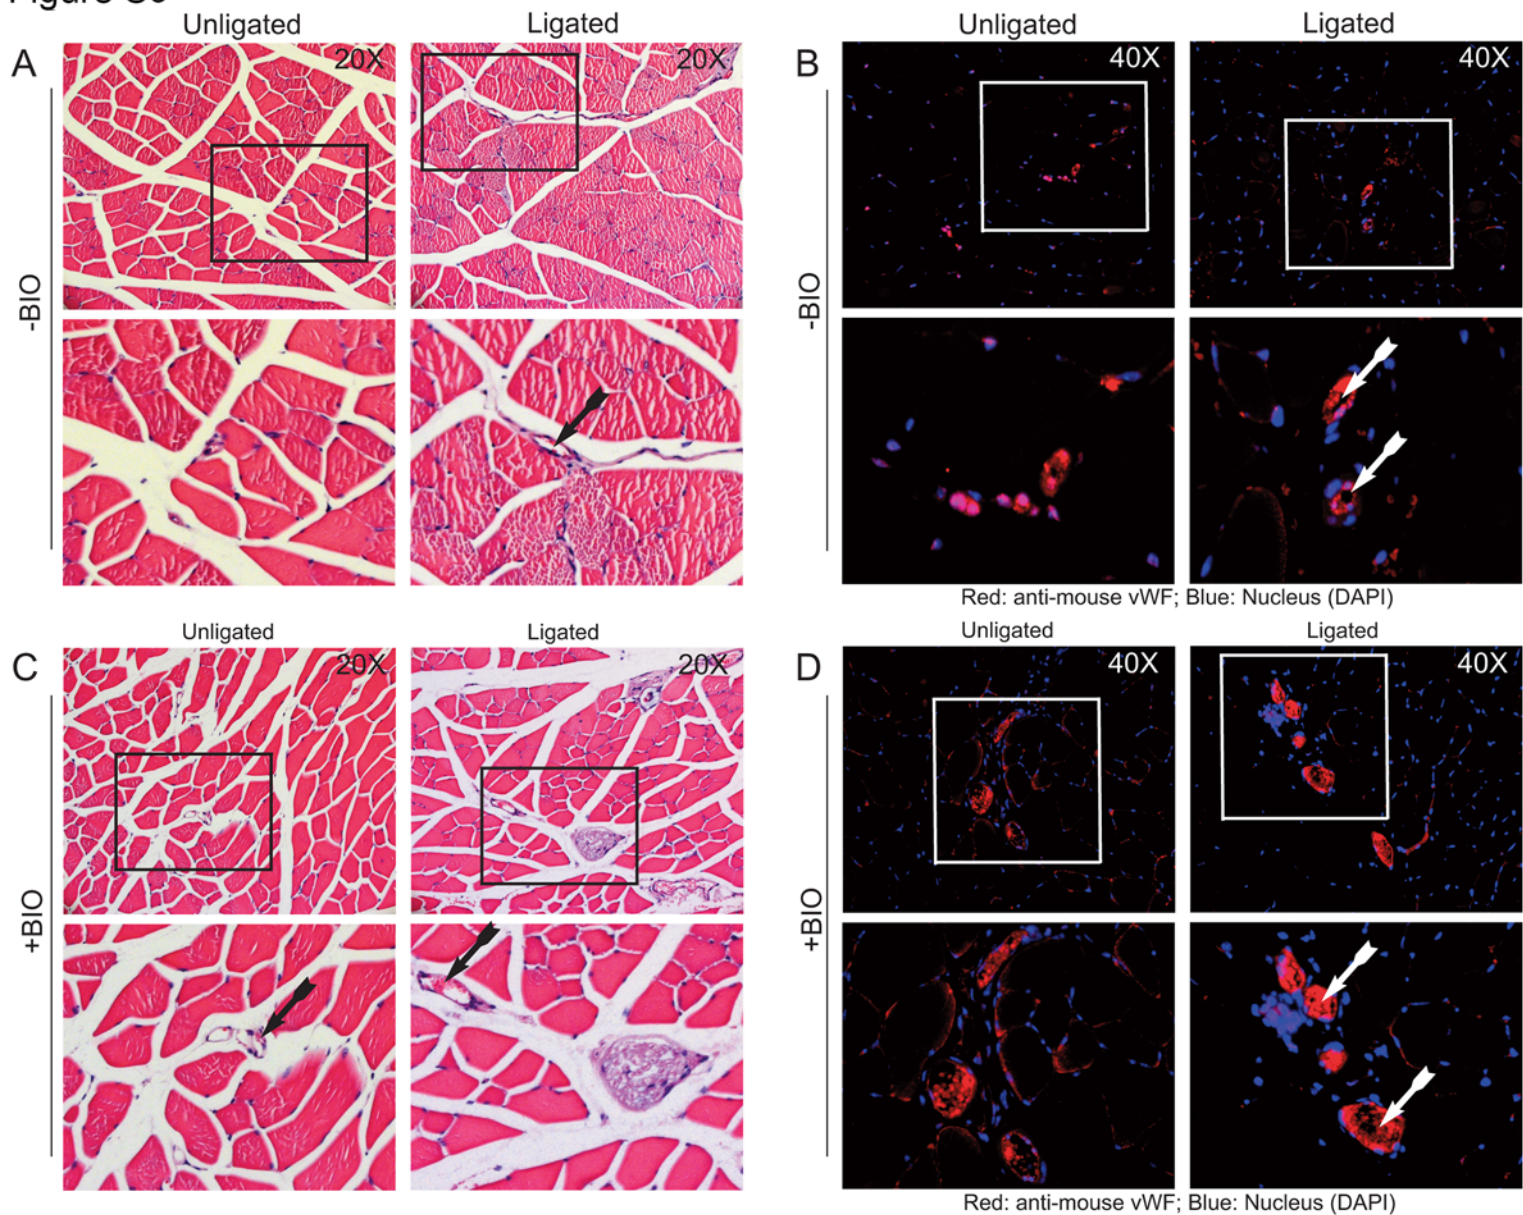

Red: anti-mouse vWF; Blue: Nucleus (DAPI)

Unligated Ligated

Unligated Ligated

Red: anti-mouse vWF; Blue: Nucleus (DAPI)

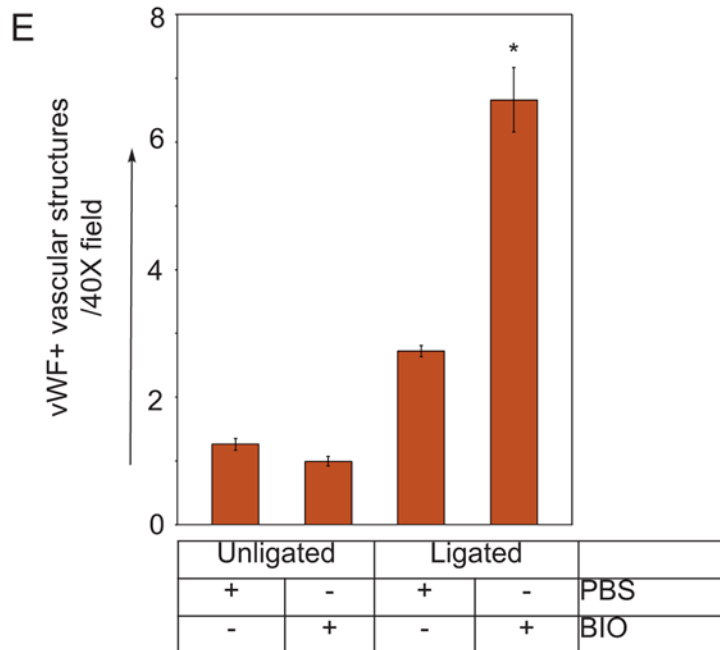



Figure S10

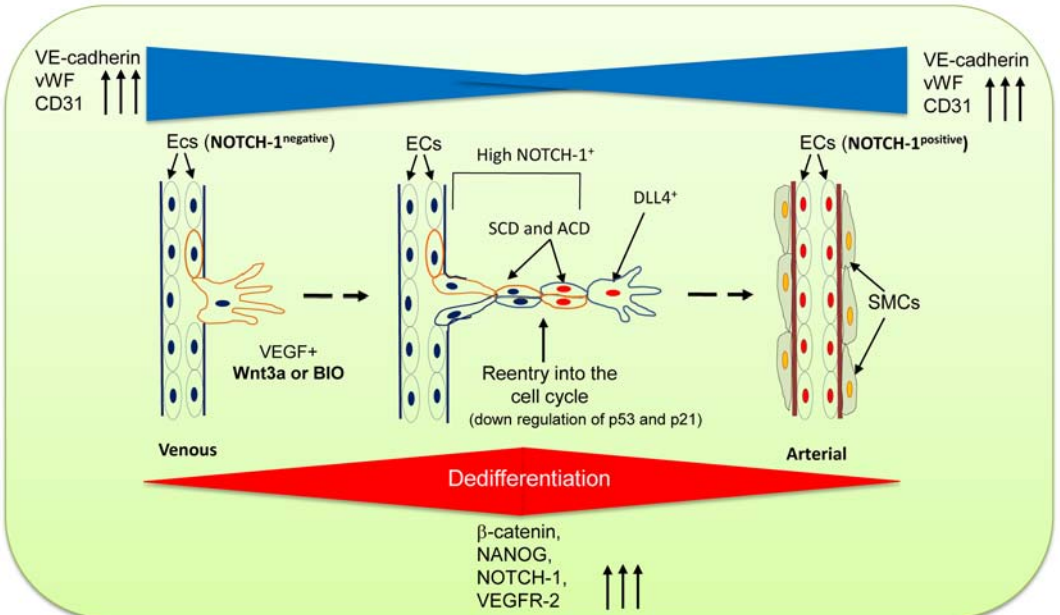

Supplement: NIHMS566441-supplement-Supp_Fig_S1-S10.pdf [file NIHMS566441-supplement-Supp_Fig_S1-S10.pdf]
